# Supplementary material for: Evidence for retained spike-binding and neutralizing activity against emerging SARS-CoV-2 variants in serum of COVID-19 mRNA vaccine recipients
Source: PubMed Central journal article supplement — eBioMedicine. 2021 Oct 20;73:103626. doi: 10.1016/j.ebiom.2021.103626 (PMC8527879; doi:10.1016/j.ebiom.2021.103626), 2021-10-20
Supplement: mmc1.pdf [file mmc1.pdf]

1 Evidence for retained spike-binding and neutralizing activity against emerging SARS-CoV-2 variants in  
 2 serum of COVID-19 mRNA vaccine recipients

3

4 Supplemental Data

5

6 **Supplementary Table 1.** Information on the viral isolates used in neutralization assays.

7

| Isolate # | GISAID ID       | Isolate ID                  | Lineage   | RBD substitutions   | NTD deletions         | NTD substitutions | Spike substitutions                                   |
|-----------|-----------------|-----------------------------|-----------|---------------------|-----------------------|-------------------|-------------------------------------------------------|
| NR-52281  | EPI_ISL_404895  | USA-WA1/2020                | A         | None                | None                  | None              | None                                                  |
| PV24850   | EPI_ISL_3690642 | USA/NY-MSHSPSP-PV24850/2020 | B.1.526   | None                | None                  | T95I, D253G       | L5F,T95I,D253G,D614G,A701V                            |
| PV25278   | EPI_ISL_1300884 | USA/NY-MSHSPSP-PV25278/2021 | B.1.526.2 | S477N               | None                  | T95I, D253G       | L5F,T95I,D253G,S477N,D614G,Q957R                      |
| PV26425   | EPI_ISL_1300892 | USA/NY-MSHSPSP-PV26425/2021 | B.1.526   | E484K               | None                  | T95I, D253G       | L5F,T95I,D253G,E484K,D614G,A701V                      |
| PV27616   | EPI_ISL_1300810 | USA/NY-MSHSPSP-PV27616/2021 | B.1.1.7   | E484K, N501Y        | H69:V70-, Y144-       | E154Q             | E154Q,E484K,N501Y,A570D,D614G,P681H,T716I,S982,D1118H |
| PV29995   | EPI_ISL_2290769 | USA/NY-MSHSPSP-PV29995/2021 | B.1.617.2 | L452R, T478K        | E156:F157-            | G142D, R158G      | T19R,G142D,R158G,L452R,T478K,D614G,P681R,A771S,D950N  |
| PV27007   | EPI_ISL_1708926 | USA/NY-MSHSPSP-PV27007/2021 | B.1.351   | K417N, E484K, N501Y | L241: A243-           | D80A, D215G       | D80A,D215G,K417,E484K,N501Y,D614G,A701V               |
| PV29369   | EPI_ISL_1709236 | USA/NY-MSHSPSP-PV29369/2021 | C.37      | L452Q, E471Q, F490S | T63:G75-, R246: G252- | D253N             | T76I,D253N,L452Q,E471Q,F490S,D614G,T859N              |

8

9

10

11 **Supplemental Table 2:** Information on the spike and RBD proteins used for the binding assays.

| <b>Mutations in the sequence of recombinant RBD and spike proteins generated for this study</b> |                |                          |                      |                                |
|-------------------------------------------------------------------------------------------------|----------------|--------------------------|----------------------|--------------------------------|
| <b>Protein</b>                                                                                  | <b>Lineage</b> | <b>RBD substitutions</b> | <b>NTD deletions</b> | <b>NTD substitutions</b>       |
| Spike                                                                                           | WA1            | None                     | None                 | None                           |
| Spike                                                                                           | B.1.1.7        | N501Y                    | 69-70, 144           | None                           |
| Spike                                                                                           | B.1.351        | K417N, E484K, N501Y      | 241-243              | L18F, D80A, D215G, R246I       |
| Spike                                                                                           | P.1            | K417T, E484K, N501Y      | None                 | L18F, T20N, P26S, D138Y, R190S |
| Spike                                                                                           | B.1.617.1      | L452R, E484Q             | None                 | T95I, G142D, E154K             |
| Spike                                                                                           | A.23           | V367F                    | None                 | F157L                          |
| RBD                                                                                             | WA1            | None                     | NA                   | NA                             |
| RBD                                                                                             | B.1.1.7        | N501Y                    | NA                   | NA                             |
| RBD                                                                                             | B.1.351        | K417K, E484K, N501Y      | NA                   | NA                             |
| RBD                                                                                             | P.1            | K417T, E484K, N501Y      | NA                   | NA                             |

12

13 **Supplementary Table 3.** Information on the post vaccine sera used in the neutralization assays (provided  
 14 to BEI and distributed by BEI as SARS-CoV-2 Vaccine Human Serum Catalog No. NR-55279).

| Catalog number | Sample | Vaccine Type <sup>#</sup> | Serology prior to vaccination | Gender | Age range | Days since first vaccine dose (at time of sample collection) | Days since second vaccine dose (at time of sample collection) |
|----------------|--------|---------------------------|-------------------------------|--------|-----------|--------------------------------------------------------------|---------------------------------------------------------------|
| NR-55247       | 77579  | Moderna                   | Negative                      | Female | 20 to 29  | 30                                                           | 2                                                             |
| NR-55248       | 76350  | Moderna                   | Positive                      | Male   | 30 to 39  | 35                                                           | 7                                                             |
| NR-55249       | 26973  | Moderna                   | Negative                      | Female | 40 to 49  | 32                                                           | 5                                                             |
| NR-55250       | 95482  | Moderna                   | Negative                      | Female | 30 to 39  | 31                                                           | 3                                                             |
| NR-55251       | 93764  | Moderna                   | Negative                      | Female | 40 to 49  | 34                                                           | 9                                                             |
| NR-55252       | 38258  | Moderna                   | Negative                      | Male   | 30 to 39  | 34                                                           | 5                                                             |
| NR-55253       | 14275  | Moderna                   | Positive                      | Female | 20 to 29  | 30                                                           | 2                                                             |
| NR-55254       | 22686  | Moderna                   | Positive                      | Female | 50 to 59  | 35                                                           | 5                                                             |
| NR-55255       | 80902  | Moderna                   | Negative                      | Female | 20 to 29  | 32                                                           | 6                                                             |
| NR-55256       | 91353  | Moderna                   | Positive                      | Female | 20 to 29  | 32                                                           | 5                                                             |
| NR-55257       | 66902  | Moderna                   | Negative                      | Female | 30 to 39  | 35                                                           | 10                                                            |
| NR-55258       | 47380  | Moderna                   | Negative                      | Female | 30 to 39  | 37                                                           | 9                                                             |
| NR-55259       | 32885  | Moderna                   | Negative                      | Male   | 30 to 39  | 31                                                           | 3                                                             |
| NR-55260       | 30756  | Moderna                   | Positive                      | Female | 40 to 49  | 31                                                           | 3                                                             |
| NR-55261       | 72329  | Moderna                   | Negative                      | Male   | 20 to 29  | 33                                                           | 6                                                             |
| NR-55262       | 17146  | Pfizer                    | Negative                      | Female | 30 to 39  | 47                                                           | 22                                                            |
| NR-55263       | 35098  | Pfizer                    | Negative                      | Male   | 30 to 39  | 20                                                           | 6                                                             |
| NR-55264       | 94525  | Pfizer                    | Negative                      | Male   | 40 to 49  | 28                                                           | 7                                                             |
| NR-55265       | 70771  | Pfizer                    | Negative                      | Male   | 30 to 39  | 48                                                           | 27                                                            |
| NR-55266       | 13967  | Pfizer                    | Negative                      | Female | 30 to 39  | 29                                                           | 8                                                             |
| NR-55267       | 29021  | Pfizer                    | Negative                      | Female | 50 to 59  | 42                                                           | 23                                                            |
| NR-55268       | 11348  | Pfizer                    | Negative                      | Male   | 40 to 49  | 43                                                           | 22                                                            |
| NR-55269       | 67169  | Pfizer                    | Negative                      | Female | 30 to 39  | 46                                                           | 22                                                            |
| NR-55270       | 91699  | Pfizer                    | Positive                      | Female | 20 to 29  | 49                                                           | 29                                                            |
| NR-55271       | 99695  | Pfizer                    | Positive                      | Male   | 30 to 39  | 43                                                           | 21                                                            |
| NR-55272       | 58441  | Pfizer                    | Positive                      | Male   | 60 to 69  | 43                                                           | 25                                                            |
| NR-55273       | 79044  | Pfizer                    | Positive                      | Female | 30 to 39  | 43                                                           | 22                                                            |
| NR-55274       | 87845  | Pfizer                    | Negative                      | Female | 30 to 39  | 39                                                           | 20                                                            |
| NR-55275       | 48139  | Pfizer                    | Negative                      | Male   | 30 to 39  | 29                                                           | 9                                                             |
| NR-55276       | 26461  | Pfizer                    | Negative                      | Female | 60 to 69  | 43                                                           | 21                                                            |

15 # Vaccine type: mRNA SARS-CoV-2 vaccines Moderna (mRNA-1273) or Pfizer (BNT162b2) were  
 16 administered

17  
18

**PARIS study group (in alphabetical order, Study group/Consortium):**

| <b>Name</b>                  | <b>Email address</b>                  |
|------------------------------|---------------------------------------|
| Zenab Khan                   | zenab.khan@mssm.edu                   |
| Hisaaki Kawabata             | hisaaki.kawabata@mssm.edu             |
| Parnavi Desai                | parnavi.desai@mssm.edu                |
| Dominika Bielak              | dominika.bielak@mssm.edu              |
| Johnston Tcheou              | johnstone.tcheou@mssm.edu             |
| Radhika Banu                 | radhika.banu@mountsinai.org           |
| Dr. Alberto E Paniz-Mondolfi | Alberto.Paniz-mondolfi@mountsinai.org |
| Liyong Cao                   | Liyong.Cao@mountsinai.org             |
| Brandon Gray                 | Brandon.Gray@mountsinai.org           |
| Shelcie Fabre                | Shelcie.Fabre@mountsinai.org          |
| Katherine Beach              | katherine.beach@mssm.edu              |
| Carolina Bermúdez-González   | maria.bermudez-gonzalez@mssm.edu      |
| Daniel Floda                 | daniel.floda@mssm.edu                 |
| Charles Gleason              | charles.gleason@mssm.edu              |
| Dr. Giulio Kleiner           | giulio.kleiner@mssm.edu               |
| Dr. Denise Jurczynszak       | denise.jurczynszak@icahn.mssm.edu     |
| Julia Matthews               | julia.matthews@mssm.edu               |
| Dr. Lubbertus C.F. Mulder    | lubbertus.mulder@mssm.edu             |
| Kayla Russo                  | kayla.russo@mssm.edu                  |
| Ashley Salimbangon           | ashley-beathrese.salimbangon@mssm.edu |
| Dr. Miti Saksena             | miti.saksena@mssm.edu                 |
| Amber Shin                   | amber.shin@mssm.edu                   |
| Levy A. Sominsky             | levy.sominsky@mssm.edu                |
| Rachel Chernet               | rachel.chernet@mssm.edu               |
| Emily. D. Ferreri            | emily.ferreri@mssm.edu                |
| Mahmoud Awawda               | mahmoud.awawda@mssm.edu               |
| Wanni Mendez                 | Wanni.Mendez@mountsinai.org           |

19  
20
